# Supplementary material
Source: MDPI journal article supplement (https://www.mdpi.com/2073-4352/14/4/379)
Supplement: s1 [file s1]

**Table S1.** NaX Molecular Sieve Standard PDF Card (PDF # 38-0237)

| 2-Theta (degree) | d(A)   | I(f) | (h k l)    |
|------------------|--------|------|------------|
| 6.103            | 14.470 | 100  | ( 1 1 1)   |
| 9.986            | 8.850  | 18   | ( 2 2 0)   |
| 11.727           | 7.540  | 12   | ( 3 1 1)   |
| 15.451           | 5.730  | 18   | ( 3 3 1)   |
| 18.43            | 4.810  | 5    | ( 5 1 1)   |
| 20.073           | 4.420  | 9    | ( 4 4 0)   |
| 20.984           | 4.230  | 1    | ( 5 3 1)   |
| 22.513           | 3.946  | 4    | ( 6 2 0)   |
| 23.341           | 3.808  | 21   | ( 5 3 3)   |
| 23.611           | 3.765  | 3    | ( 6 2 2)   |
| 24.647           | 3.609  | 1    | ( 4 4 4)   |
| 25.427           | 3.500  | 1    | ( 7 1 1)   |
| 26.684           | 3.338  | 18   | ( 6 4 2)   |
| 27.394           | 3.253  | 1    | ( 7 3 1)   |
| 29.247           | 3.051  | 4    | ( 7 3 3)   |
| 30.335           | 2.944  | 9    | ( 6 6 0)   |
| 30.971           | 2.885  | 19   | ( 7 5 1)   |
| 32.006           | 2.794  | 8    | ( 8 4 0)   |
| 32.618           | 2.743  | 2    | ( 9 1 1)   |
| 33.626           | 2.663  | 8    | ( 6 6 4)   |
| 34.195           | 2.620  | 3    | ( 9 3 1)   |
| 35.164           | 2.550  | 1    | ( 8 4 4)   |
| 37.376           | 2.404  | 5    | ( 10 2 2)  |
| 39.966           | 2.254  | 1    | ( 11 1 1)  |
| 40.816           | 2.209  | 3    | ( 8 8 0)   |
| 41.344           | 2.182  | 3    | ( 9 7 1)   |
| 42.173           | 2.141  | 2    | ( 10 6 0)  |
| 42.611           | 2.120  | 2    | ( 9 7 3)   |
| 43.406           | 2.083  | 1    | ( 12 0 0)  |
| 46.483           | 1.952  | 1    | ( 10 8 0)  |
| 47.097           | 1.928  | 1    | ( 10 8 2)  |
| 49.439           | 1.842  | 1    | ( 12 6 2)  |
| 51.007           | 1.789  | 1    | ( 13 5 1)  |
| 51.688           | 1.767  | 2    | ( 14 2 0)  |
| 53.177           | 1.721  | 3    | ( 11 9 3)  |
| 57.439           | 1.603  | 3    | ( 11 11 1) |

**Table S2.** LTA Molecular Sieve Standard PDF Card (PDF # 11-0589)

| 2-Theta (degree) | d(A)   | I(f) | (h k l) |
|------------------|--------|------|---------|
| 7.240            | 12.200 | 100  | (1 0 0) |
| 10.206           | 8.660  | 40   | (1 1 0) |
| 12.492           | 7.080  | 30   | (1 1 1) |
| 14.461           | 6.120  | 12   | (2 0 0) |
| 16.161           | 5.480  | 20   | (2 1 0) |
| 17.724           | 5.000  | 4    | (2 1 1) |
| 21.765           | 4.080  | 35   | (3 0 0) |
| 22.931           | 3.875  | 2    | (3 1 0) |
| 24.058           | 3.696  | 35   | (3 1 1) |
| 25.143           | 3.539  | 4    | (2 2 2) |
| 26.204           | 3.398  | 18   | (3 2 0) |
| 27.198           | 3.276  | 40   | (3 2 1) |
| 30.043           | 2.972  | 30   | (4 1 0) |
| 30.938           | 2.888  | 10   | (3 3 0) |
| 32.642           | 2.741  | 8    | (4 2 0) |
| 33.458           | 2.676  | 4    | (4 2 1) |
| 34.276           | 2.614  | 25   | (3 3 2) |
| 35.861           | 2.502  | 8    | (4 2 2) |
| 36.634           | 2.451  | 8    | (4 3 0) |
| 38.116           | 2.359  | 4    | (5 1 1) |
| 40.264           | 2.238  | 4    | (5 2 1) |
| 41.663           | 2.166  | 8    | (4 4 0) |
| 42.173           | 2.141  | 8    | (4 4 1) |
| 42.972           | 2.103  | 6    | (5 3 0) |
| 43.604           | 2.074  | 2    | (5 3 1) |
| 44.323           | 2.042  | 4    | (6 0 0) |
| 47.462           | 1.914  | 4    | (5 4 0) |
| 48.076           | 1.891  | 4    | (5 4 1) |
| 52.780           | 1.733  | 12   | (5 5 0) |
| 54.475           | 1.683  | 4    | (7 2 0) |
| 55.042           | 1.667  | 2    | (7 2 1) |
| 56.667           | 1.623  | 2    | (7 2 2) |
| 57.244           | 1.608  | 6    | (7 3 0) |
| 58.804           | 1.569  | 4    | (6 5 0) |

**Table S3.** Sodalite Standard PDF Card (PDF # 37-0196 )

| 2-Theta (degree) | d(A)  | I(f) | (h k l)  |
|------------------|-------|------|----------|
| 14.024           | 6.310 | 53   | ( 1 1 0) |
| 19.891           | 4.460 | 4    | ( 2 0 0) |
| 24.434           | 3.640 | 100  | ( 2 1 1) |
| 31.703           | 2.820 | 21   | ( 3 1 0) |
| 34.742           | 2.580 | 36   | ( 2 2 2) |
| 37.767           | 2.380 | 15   | ( 3 2 1) |
| 42.972           | 2.103 | 36   | ( 4 1 1) |
| 45.425           | 1.995 | 2    | ( 4 2 0) |
| 47.780           | 1.902 | 3    | ( 3 3 2) |
| 50.048           | 1.821 | 5    | ( 4 2 2) |
| 52.228           | 1.750 | 9    | ( 4 3 1) |
| 56.439           | 1.629 | 1    | ( 5 2 1) |
| 58.477           | 1.577 | 10   | ( 4 4 0) |
| 60.457           | 1.530 | 9    | ( 4 3 3) |
| 62.398           | 1.487 | 7    | ( 6 0 0) |
| 64.326           | 1.447 | 7    | ( 5 3 2) |
| 66.174           | 1.411 | 1    | ( 6 2 0) |
| 68.027           | 1.377 | 4    | ( 5 4 1) |
| 69.877           | 1.345 | 4    | ( 6 2 2) |
| 71.714           | 1.315 | 2    | ( 6 3 1) |
| 73.460           | 1.288 | 3    | ( 4 4 4) |
| 75.232           | 1.262 | 1    | ( 5 5 0) |
| 77.027           | 1.237 | 1    | ( 6 4 0) |
| 78.765           | 1.214 | 4    | ( 5 5 2) |
| 80.513           | 1.192 | 1    | ( 6 4 2) |
| 82.264           | 1.171 | 2    | ( 7 3 0) |
| 85.665           | 1.133 | 2    | ( 6 5 1) |
| 87.392           | 1.115 | 1    | ( 8 0 0) |
| 89.100           | 1.098 | 2    | ( 5 5 4) |
| 90.780           | 1.082 | 1    | ( 8 2 0) |
| 94.260           | 1.051 | 1    | ( 8 2 2) |
| 95.940           | 1.037 | 1    | ( 7 4 3) |
| 97.695           | 1.023 | 2    | ( 6 6 2) |
| 99.397           | 1.010 | 1    | ( 7 5 2) |
| 101.120          | 0.997 | 2    | ( 8 4 0) |
| 102.875          | 0.985 | 1    | ( 9 1 0) |
| 106.395          | 0.962 | 1    | ( 7 6 1) |
| 108.186          | 0.951 | 1    | ( 6 6 4) |
| 110.007          | 0.940 | 1    | ( 8 5 1) |
| 113.685          | 0.920 | 1    | ( 7 6 3) |
| 115.558          | 0.911 | 1    | ( 8 4 4) |
| 117.480          | 0.901 | 1    | ( 7 7 0) |

**Table S3.** Sodalite Standard PDF Card (PDF # 37-0196 ) (Continued)

| 2-Theta (degree) | d(A)  | I(f) | (h k l)   |
|------------------|-------|------|-----------|
| 121.395          | 0.883 | 1    | ( 10 1 1) |
| 125.510          | 0.866 | 1    | ( 9 4 3)  |
| 127.622          | 0.858 | 1    | ( 6 6 6)  |
| 129.801          | 0.851 | 1    | ( 7 6 5)  |
| 134.422          | 0.836 | 1    | ( 7 7 4)  |
| 136.855          | 0.828 | 1    | ( 8 6 4)  |
